# Supplementary material
Source: PubMed Central journal article supplement (PMC2957513)

**A** Dox E7.5-E15.5

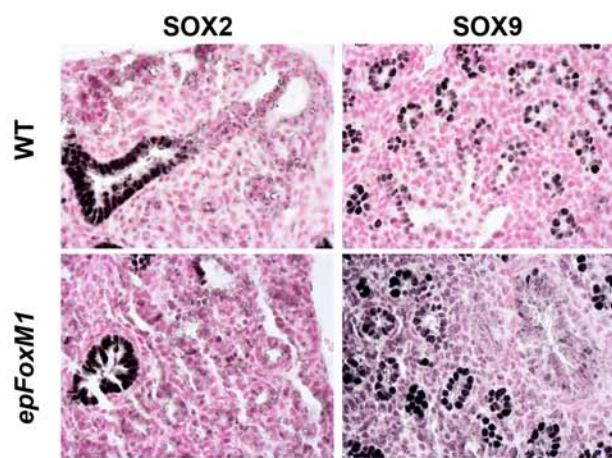

**B**

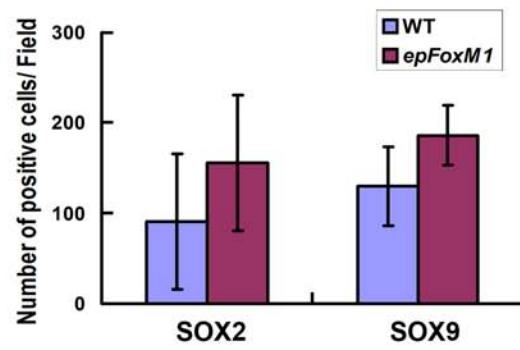

**C** Dox P3 - P30

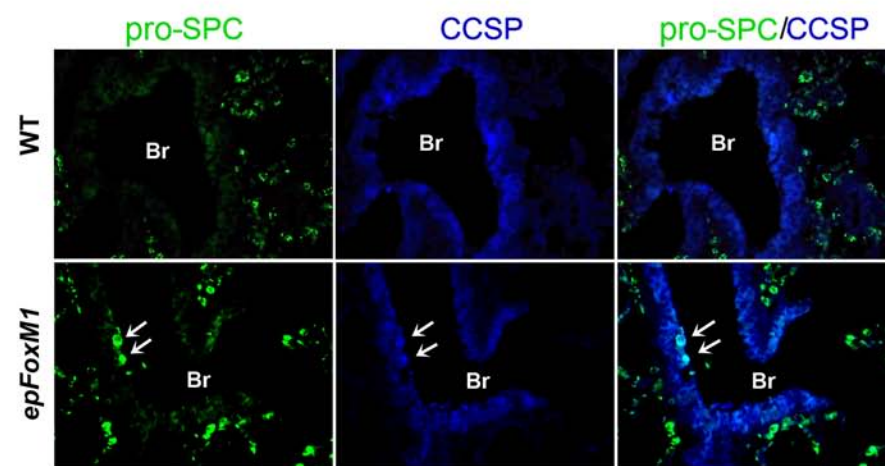

**D**

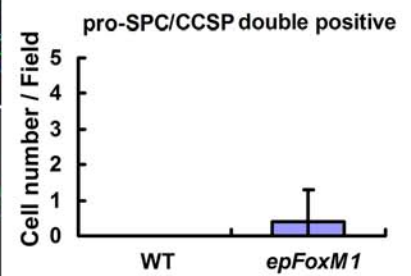

Wang et al., Supplemental Fig. 2

**A**

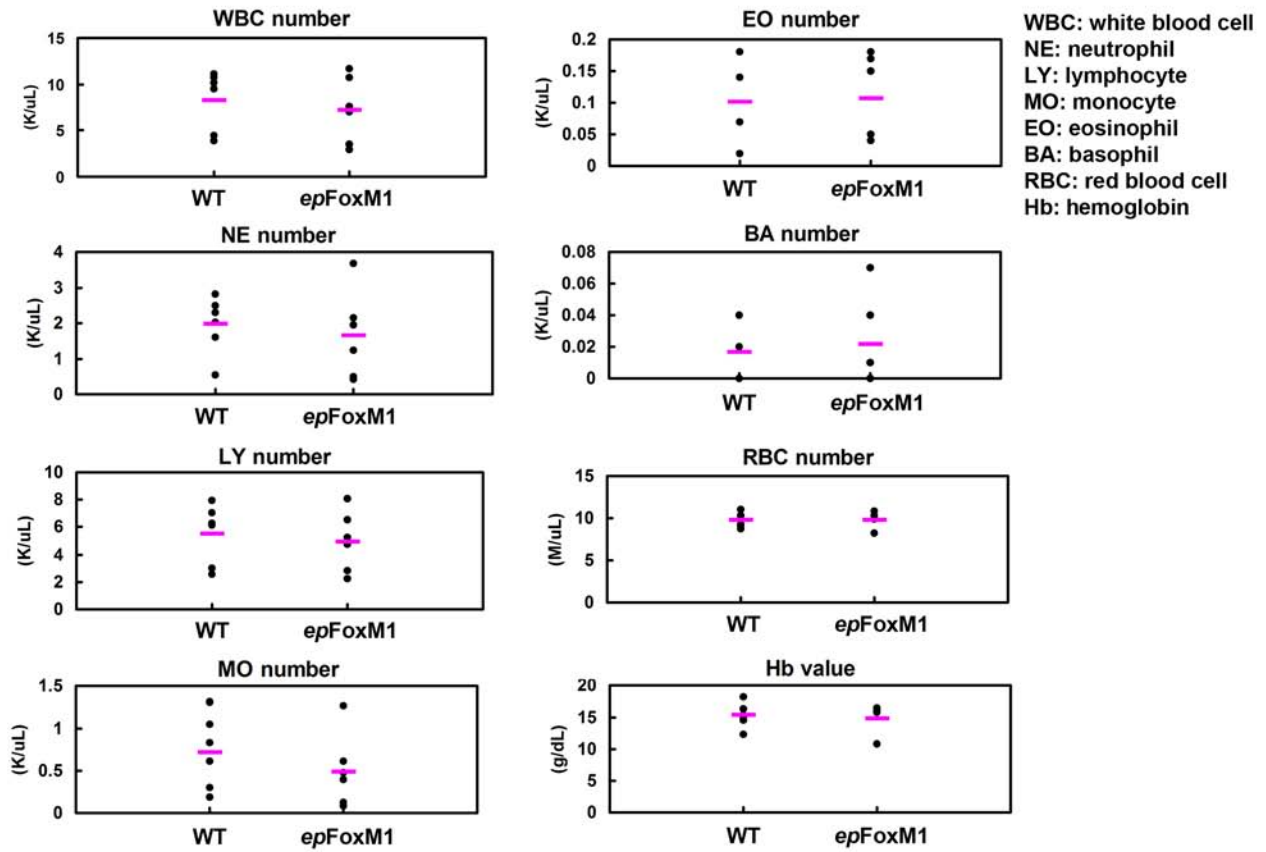

**B**

Dox P30-P120

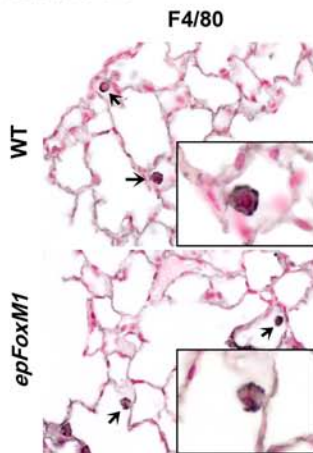

**C**

Dox P3-P30

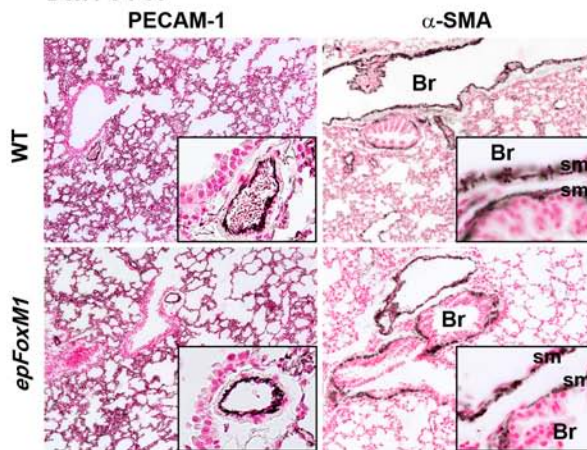

Supplement: NIHMS234664-supplement-02.pdf [file NIHMS234664-supplement-02.pdf]
